# Supplementary material
Source: MDPI journal article supplement (https://www.mdpi.com/2079-6412/12/1/97)
Supplement: s1 [file s1 › coatings-1529906-supplementary.pdf]

# Supplementary Materials: Silica-Supported Assemblage of Cu<sup>II</sup> Ions with Carbon Dots for Self-Boosting and Glutathione-Induced ROS Generation

Olga Bochkova <sup>1,2,\*</sup>, Alexey Dovjenko <sup>2</sup>, Rustem Zairov <sup>1</sup>, Kirill Kholin <sup>3</sup>, Rinata Biktimirova <sup>2</sup>, Svetlana Fedorenko <sup>1</sup>, Irek Nizameev <sup>1</sup>, Artem Laskin <sup>2</sup>, Alexandra Voloshina <sup>1</sup>, Anna Lyubina <sup>1</sup>, Syumbelya Amerhanova <sup>1</sup>, Amina Daminova <sup>4</sup>, Vladimir Evtugyn <sup>4</sup>, Tatiana Gerasimova <sup>1</sup> and Asiya Mustafina <sup>1</sup>

- <sup>1</sup> Arbuzov Institute of Organic and Physical Chemistry, FRC Kazan Scientific Center of RAS, Arbuzov Str., 8, 420088 Kazan, Russia; rustem02@yandex.ru (R.Z.); svetlana.fedorenko@yahoo.com (S.F.); irek.rash@gmail.com (I.N.); sobaka-1968@mail.ru (A.V.); aplyubina@gmail.com (A.L.); syumbelya07@mail.ru (S.A.); tatyana@gmail.com (T.G.); asiyamust@mail.ru (A.M.)
  - <sup>2</sup> Alexander Butlerov Institute of Chemistry, Kazan (Volga Region) Federal University, 18 Kremlyovskaya Str., 420008 Kazan, Russia; aleksej\_dovghenko@mail.ru (A.D.); rinatuci@mail.ru (R.B.); artemka166@mail.ru (A.L.)
  - <sup>3</sup> Institute of radio electronics, photonics and digital technologies, Kazan National Research Technical University named after A.N. Tupolev-KAI, 10, K. Marx str., 420111 Kazan, Russia; kholin06@mail.ru
  - <sup>4</sup> Interdisciplinary center for analytical microscopy, Kazan (Volga Region) Federal University, 9 Paris Commune Str., 420008 Kazan, Russia; aminochka\_88@mail.ru (A.D.); VGEvtjugin@kpfu.ru (V.E.)
- \* Correspondence: o.d.bochkova@mail.ru

**Citation:** Bochkova, O.; Dovjenko, A.; Zairov, R.; Kholin, K.; Biktimirova, R.; Fedorenko, S.; Nizameev, I.; Laskin, A.; Voloshina, A.; Lyubina, A.; et al. Silica-Supported Assemblage of Cu<sup>II</sup> Ions with Carbon Dots for Self-Boosting and Glutathione-Induced ROS Generation. *Coatings* **2022**, *12*, 97. <https://doi.org/10.3390/coatings12010097>

Academic Editor:  
Ajay Vikram Singh

Received: 13 December 2021  
Accepted: 11 January 2022  
Published: 15 January 2022

**Publisher's Note:** MDPI stays neutral with regard to jurisdictional claims in published maps and institutional affiliations.

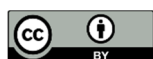

**Copyright:** © 2022 by the authors. Licensee MDPI, Basel, Switzerland. This article is an open access article distributed under the terms and conditions of the Creative Commons Attribution (CC BY) license (<https://creativecommons.org/licenses/by/4.0/>).

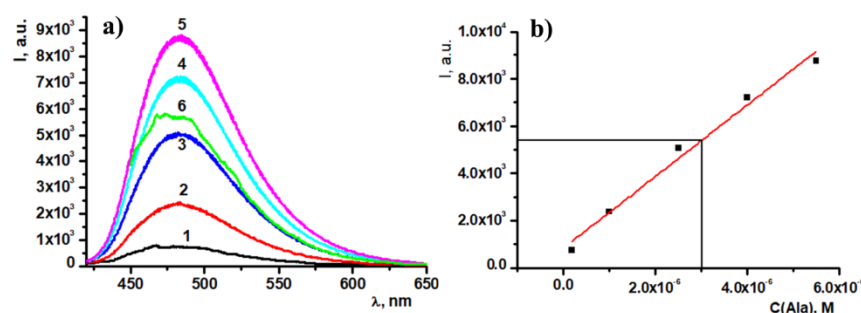

**Figure S1.** (a) The emission spectra of fluorophore, obtained from interaction of fluorescamine (0.55 mM) with various concentrations of alanine (1— $1.6 \times 10^{-7}$ , 2— $1 \times 10^{-6}$ , 3— $2.5 \times 10^{-6}$ , 4— $4 \times 10^{-6}$ , 5— $5.5 \times 10^{-2}$ ), SNs-NH<sub>2</sub> (6) (0.05 g·L<sup>-1</sup>), at 0.025 M borate buffer pH = 9,  $\lambda_{ex} = 390$  nm; (b) the calibration graphic.

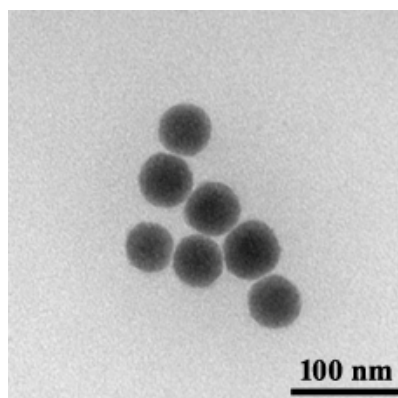

**Figure S2.** TEM-image of SNs.

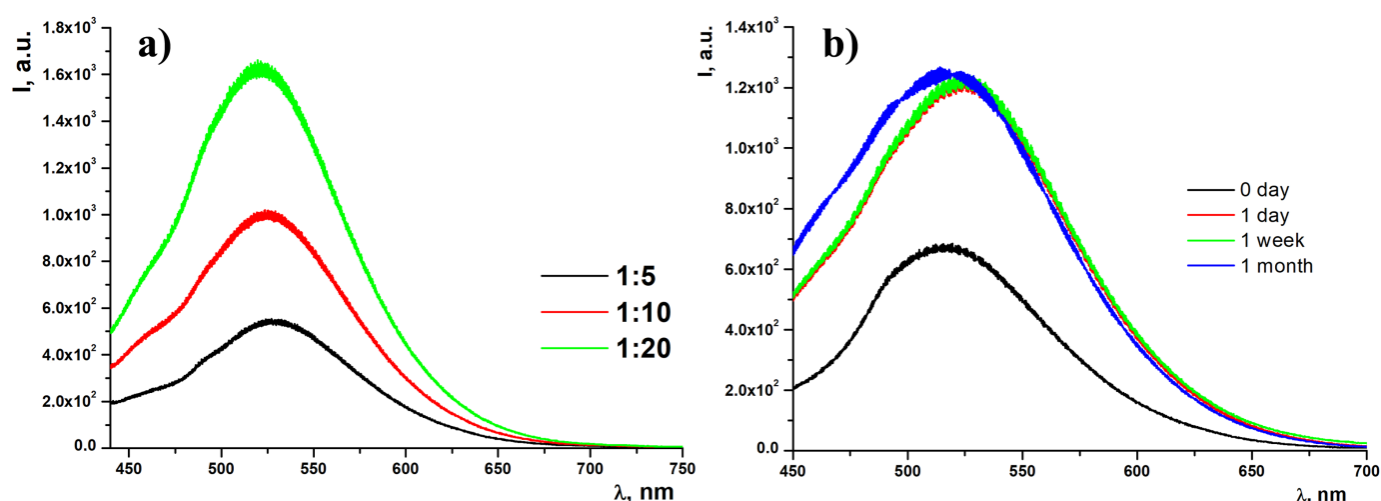

**Figure S3.** The emission spectra of water dispersion of SNs-NH<sub>2</sub>-Cu<sup>II</sup>-CDs (0.5 gL<sup>-1</sup>): (a) prepared by mixing of water dispersions of SNs-NH<sub>2</sub>-Cu<sup>II</sup> and CDs at different concentration ratios (SNs:CDs) designated on the graphic, after 1 day of storage; (b) SNs-NH<sub>2</sub>-Cu<sup>II</sup>-CDs prepared at SNs:CDs=1:20 after various period of time of this system storage (also designated on the graphic).  $\lambda_{\text{ex}} = 420$  nm, slit = 5 nm, voltage = 500 mV.

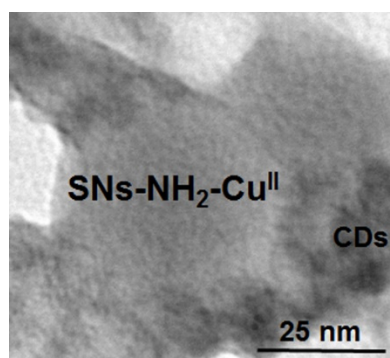

**Figure S4.** TEM-image of SNs-NH<sub>2</sub>-Cu<sup>II</sup>-CDs, where SNs are manifested by the larger silica spheres, while the CDs as black dots on their surface.

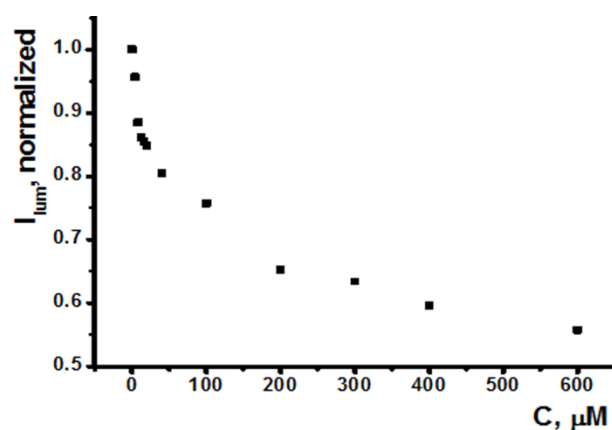

**Figure S5.** The dependence of the emission intensity of CDs (0.005 gL<sup>-1</sup>) on the concentration of CuCl<sub>2</sub> in water;  $\lambda_{\text{ex}} = 420$  nm, slit = 5 nm, voltage = 700 mV. The emission intensity was normalized to initial luminescent intensity of CDs before addition of water solution of CuCl<sub>2</sub>.

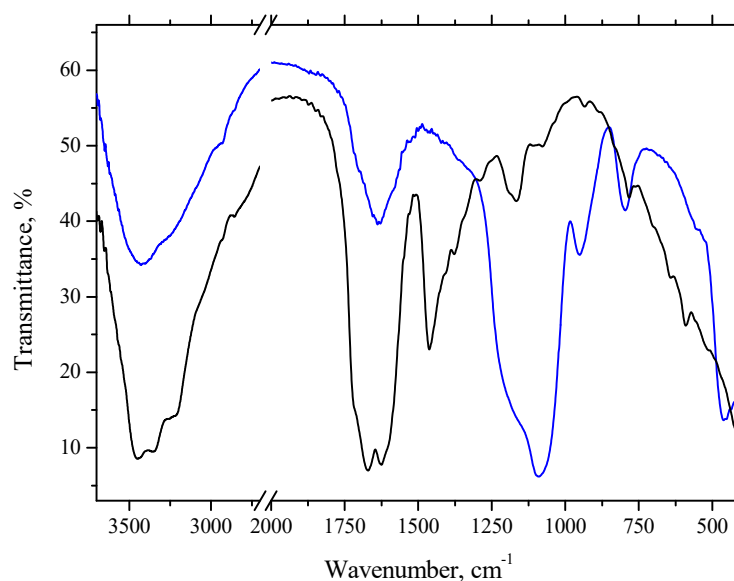

**Figure S6.** The Infrared spectrum of CDs (black) and SNs-NH<sub>2</sub>-Cu<sup>II</sup>-CDs (blue).

Infrared spectrum of CDs (black) contains bands at the region 3200–3500 cm<sup>-1</sup>, most probably associated with stretching vibrations of OH and NH<sub>2</sub> groups, weak bands at 2865 and 2931 cm<sup>-1</sup> correspond to stretching vibrations of aliphatic CH groups. Complex band at 1600–1750 cm<sup>-1</sup> suggests the presence of amide group in the sample. Bands at 1462 cm<sup>-1</sup> and 1377 cm<sup>-1</sup> are tentatively interpreted as CH<sub>2</sub> and CH<sub>3</sub> deformations.

The spectrum of SNs-NH<sub>2</sub>-Cu<sup>II</sup>-CDs (blue) contains very strong bands of –Si–O–Si– deformations at 1100–1200 cm<sup>-1</sup>. The characteristic bands of C-dots are whether weak compared to silica NP (1460–1370 cm<sup>-1</sup>) or masked by absorption of water molecules at 3200–3600 and ~ 1650 cm<sup>-1</sup>. However detailed analysis of the latter allows to find a weak shoulder at ~1720 cm<sup>-1</sup>. The maximum at 1655 cm<sup>-1</sup> can be associated with amide group and its shift compared to 1670 cm<sup>-1</sup> in CDs spectrum may point to some changes in structure, related with this group.

Thus, the analysis of infrared spectra allows tentatively assume some changes in the CDs structures in the samples with silica nanoparticles, most probably affecting amide groups.

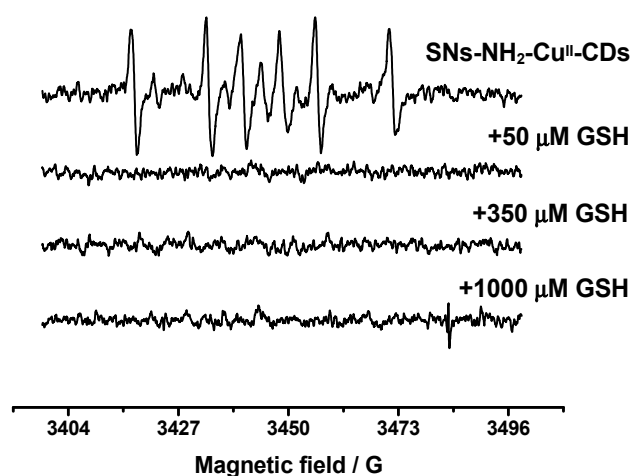

**Figure S7.** The ESR spectra of SNs-NH<sub>2</sub>-Cu<sup>II</sup>-CDs (0.5 gL<sup>-1</sup>; 10 μM of Cu<sup>II</sup>) in the presence of GSH at 50, 350 and 1000 μM with DMPO spin trap (0.1 M) at 22 °C.

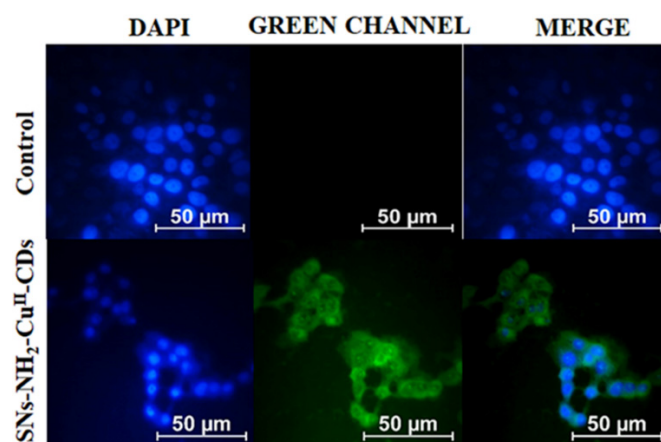

**Figure S8.** Fluorescent microscopy images of M-HeLa cells incubated with SNs-NH<sub>2</sub>-Cu<sup>II</sup>-CDs at 0.5 gL<sup>-1</sup> (Nikon eclipse Ci, ×1000 oil).

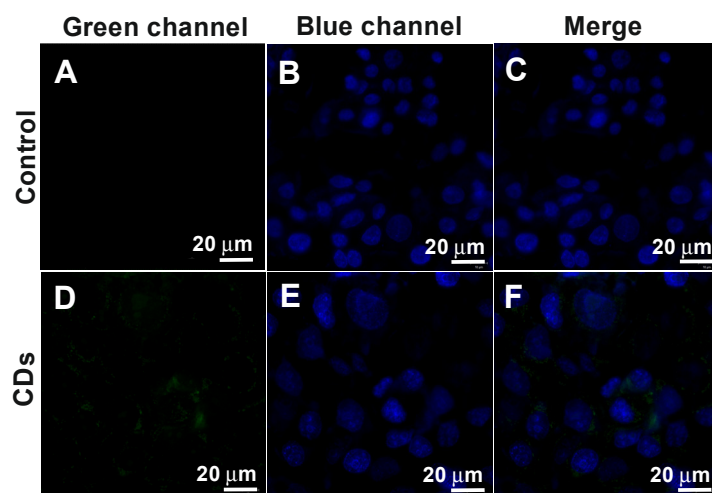

**Figure S9.** Confocal laser microscopy images of the control M-HeLa cell lines (A–C) and cells, incubated with CDs (D–F) at 0.5 gL<sup>-1</sup> stained with DAPI.
